# Supplementary material
Source: PubMed Central journal article supplement (PMC3092865)
Supplement: NIHMS277890-supplement-Supp_Table_S1.pdf [file NIHMS277890-supplement-Supp_Table_S1.pdf]

**Table-S1: PDB codes, resolution and affinities of protein-ligand complexes examined in this work. The stars at the rear of  $K_i$ 's values indicate they are apparent  $K_i$ , meaning the related experiments are performed in biological medium, e.g. living organisms, blood assay. The last column lists the original publications that report  $K_i$ 's involved in our study. Double blank lines are used to separate protein families and single lines for segregation of sub-families according to 90% homology.**

| Protein Family | PDB code | Resolution | Affinity                | Ref |
|----------------|----------|------------|-------------------------|-----|
| trypsn $\beta$ | 1c1r     | 1.37       | $K_i=0.0235\mu\text{M}$ | 1   |
|                | 1c5p     | 1.43       | $K_i=21\mu\text{M}$     | 2   |
|                | 1c5q     | 1.43       | $K_i=0.44\mu\text{M}$   | 2   |
|                | 1c5s     | 1.36       | $K_i=1.0\mu\text{M}$    | 2   |
|                | 1c5t     | 1.37       | $K_i=80\mu\text{M}$     | 2   |
|                | 1ce5     | 1.9        | $K_i=18.4\mu\text{M}$   | 3   |
|                | 1f0t     | 1.8        | $K_i=1000\text{nM}$ *   | 4,5 |
|                | 1g3b     | 1.8        | $K_i=1.8\mu\text{M}$    | 6-9 |
|                |          |            |                         | 10  |
|                | 1ghz     | 1.39       | $K_i=16\mu\text{M}$     |     |
|                | 1gi1     | 1.42       | $K_i=3.4\mu\text{M}$    | 10  |
|                | 1gi4     | 1.37       | $K_i=0.065\mu\text{M}$  | 10  |
|                | 1gj6     | 1.5        | $K_i=0.10\mu\text{M}$   | 10  |
|                | 1k1i     | 2.2        | $K_d=264\text{nM}$      |     |
|                | 1k1j     | 2.2        | $K_d=28\text{nM}$       |     |
|                | 1k1l     | 2.5        | $K_d=125\text{nM}$      |     |
|                | 1k1m     | 2.2        | $K_d=40\text{nM}$       |     |
|                | 1o2h     | 1.77       | $K_i=0.068\mu\text{M}$  | 11  |
|                | 1o2j     | 1.65       | $K_i=0.12\mu\text{M}$   | 11  |
|                | 1o2n     | 1.5        | $K_i=0.81\mu\text{M}$   | 11  |
|                | 1o2o     | 1.63       | $K_i=0.44\mu\text{M}$   | 11  |
|                | 1o2q     | 1.5        | $K_i=0.021\mu\text{M}$  | 11  |
|                | 1o2s     | 1.65       | $K_i=3.4\mu\text{M}$    | 11  |
|                | 1o2w     | 1.38       | $K_i=1.4\mu\text{M}$    | 11  |
|                | 1o2x     | 1.46       | $K_i=1.4\mu\text{M}$    | 11  |
|                | 1o2z     | 1.65       | $K_i=0.78\mu\text{M}$   | 11  |
|                | 1o30     | 1.55       | $K_i=0.17\mu\text{M}$   | 11  |
|                | 1o33     | 1.46       | $K_i=1.8\mu\text{M}$    | 11  |
|                | 1o36     | 1.7        | $K_i=1.1\mu\text{M}$    | 11  |
|                | 1o38     | 1.38       | $K_i=0.15\mu\text{M}$   | 11  |
|                | 1o3d     | 1.33       | $K_i=0.074\mu\text{M}$  | 11  |
|                | 1o3f     | 1.55       | $K_i=0.011\mu\text{M}$  | 11  |
|                | 1o3h     | 1.53       | $K_i=0.05\mu\text{M}$   | 11  |
|                | 1o3i     | 1.51       | $K_i=0.05\mu\text{M}$   | 11  |
|                | 1o3j     | 1.4        | $K_i=0.17\mu\text{M}$   | 11  |

|      |      |             |        |
|------|------|-------------|--------|
| 1o3k | 1.43 | Ki=0.17uM   | 11     |
| 1pph | 1.9  | Ki=1.2uM    | 12     |
| 1qb6 | 1.8  | Ki=870nM    | 13     |
| 1qb9 | 1.8  | Ki=36nM     | 13     |
| 1qbn | 1.8  | Ki=1400nM   | 13     |
| 1qbo | 1.8  | Ki=18nM     | 13     |
| 1tng | 1.8  | Ki=1.17mM   | 14     |
| 1tnh | 1.8  | Ki=0.43mM   | 14     |
| 1tni | 1.9  | Ki=0.10mM   | 14     |
| 1tnj | 1.8  | Ki=11.0mM   | 14     |
| 1tnk | 1.8  | Ki=32.5mM   | 14     |
| 1tnl | 1.9  | Ki=13.3mM   | 14     |
| 1v2j | 1.9  | Ki=566uM    | 15     |
| 1v2k | 2    | Ki=0.65uM   | 15     |
| 1v2l | 1.6  | Ki=51uM     | 15     |
| 1v2n | 1.8  | Ki=1.25uM   | 15     |
| 1v2s | 1.72 | Ki=68uM     | 15     |
| 1v2u | 1.8  | Ki=427uM    | 15     |
| 2bza | 1.9  | Ki=1.58mM   | 3      |
| 1j14 | 2.4  | Ki=32.2uM   | 16, 17 |
| 1j16 | 1.6  | Ki=143uM    | 16, 17 |
| 1j17 | 2    | Ki=6.05uM   | 16, 17 |
| 1h4w | 1.7  | Ki=22uM     | 18     |
| 1bcu | 2    | Kd=0.53mM   |        |
| 1c1u | 1.75 | Ki=0.0056uM | 1      |
| 1c1v | 1.98 | Ki=0.023uM  | 1      |
| 1c5n | 1.5  | Ki=20uM     | 2      |
| 1c5o | 1.9  | Ki=320uM    | 2      |
| 1d3d | 2.04 | Kd=0.81nM   |        |
| 1d4p | 2.07 | Kd=0.5uM    |        |
| 1ghv | 1.85 | Ki=45uM     | 10     |
| 1ghw | 1.75 | Ki=63uM     | 10     |
| 1ghy | 1.85 | Ki=0.008uM  | 10     |
| 1mu6 | 1.99 | Ki=4.2nM    | 19     |
| 1mu8 | 2    | Ki=1.0nM    | 19     |
| 1mue | 2    | Ki=2.3nM    | 20     |
| 1oyt | 1.67 | Ki=0.057uM  | 21     |
| 1qbv | 1.8  | Ki=4100nM   | 22     |
| 1tom | 1.8  | Ki=5nM      | 23, 24 |

thrombin  $\alpha$

|         |      |          |            |    |
|---------|------|----------|------------|----|
|         | 1vzq | 1.54     | Ki=36nM    | 25 |
|         | 1d6w | 2        | Ki=1100nM  | 26 |
|         | 1d9i | 2.3      | Ki=0.78nM  | 26 |
|         | 1nm6 | 1.8      | Ki=0.09nM  | 27 |
|         | 1nt1 | 2        | Ki=1.3nM   | 27 |
|         | 1s13 | 1.81     | Ki=1.4pM   | 28 |
|         | 1ta2 | 2.3      | Ki=3nM     | 29 |
|         | 1z71 | 1.8      | Ki=0.66nM  | 30 |
|         | 1zgi | 2.2      | Ki=4.6uM   | 31 |
|         | 1c4u | 2.1      | Ki=0.043nM | 26 |
|         | 1c4v | 2.1      | Ki=0.016nM | 26 |
|         | 1uvt | 2.5      | Ki=0.023uM | 32 |
| CDK+PKA | 1b38 | 2        | Kd=0.254uM |    |
|         | 1b39 | 2.1      | Kd=0.120uM |    |
|         | 1e1v | 1.95     | Ki=12uM    | 23 |
|         | 1e1x | 1.85     | Ki=1.3uM   | 23 |
|         | 1pxn | 2.5      | Ki=0.07uM  | 33 |
|         | 1pxo | 1.96     | Ki=2.0nM   | 33 |
|         | 1pxp | 2.3      | Ki=0.22uM  | 33 |
|         | 2fvd | 1.85     | Ki=3nM     | 34 |
|         | 1h1p | 2.1      | Ki=12uM    | 35 |
|         | 1h1s | 2        | Ki=6nM     | 35 |
|         | 1rej | 2.2      | Ki=5nM     | 36 |
|         | 1q8t | 2        | Kd=17.5uM  |    |
|         | 1q8u | 1.9      | Kd=1.1uM   |    |
|         | 1q8w | 2.2      | Kd=5.7uM   |    |
|         | 1stc | 2.3      | Ki=8nM     | 37 |
|         | 1ydr | 2.2      | Ki=3.0uM   | 38 |
|         | 1yds | 2.2      | Ki=1.2uM   | 38 |
| 1ydt    | 2.3  | Ki=48nM  | 38         |    |
| 2erz    | 2.2  | Ki=2.2uM | 39         |    |

|                                      |      |      |            |    |    |
|--------------------------------------|------|------|------------|----|----|
| urokinase-type plasminogen activator | 1c5x | 1.75 | Ki=0.21uM  | 2  |    |
|                                      | 1c5y | 1.65 | Ki=63uM    | 2  |    |
|                                      | 1c5z | 1.85 | Ki=97uM    | 2  |    |
|                                      | 1gi7 | 1.79 | Ki=31uM    | 10 |    |
|                                      | 1gj7 | 1.5  | Ki=0.013uM | 40 |    |
|                                      | 1gj8 | 1.64 | Ki=0.11uM  | 40 |    |
|                                      | 1gja | 1.56 | Ki=3.8uM   | 40 |    |
|                                      | 1gjb | 1.9  | Ki=0.45uM  | 40 |    |
|                                      | 1gjc | 1.73 | Ki=0.45uM  | 40 |    |
|                                      | 1gjd | 1.75 | Ki=6.0uM   | 40 |    |
|                                      | 1o3p | 1.81 | Ki=0.22uM  | 11 |    |
|                                      | 1ejn | 1.8  | Ki=2.4uM   | 41 |    |
|                                      | 1f5k | 1.8  | Ki=180uM   | 42 |    |
|                                      | 1f5l | 2.1  | Ki=5.3uM   | 42 |    |
|                                      | 1owe | 1.6  | Ki=631nM   | 43 |    |
|                                      | 1owh | 1.61 | Ki=40nM    | 43 |    |
|                                      | 1sqa | 2    | Ki=0.62nM  | 44 |    |
|                                      | 1sqa | 2    | Ki=0.62nM  | 44 |    |
|                                      | 1sqo | 1.84 | Ki=0.035uM | 44 |    |
|                                      | 1sqt | 1.9  | Ki=0.63uM  | 44 |    |
| $\beta$ -glucosidase A               | 1oif | 2.12 | Kd=19nM    | 45 |    |
|                                      | 1uz1 | 2    | Ki=130nM   |    |    |
|                                      | 1w3j | 2    | Kd=484nM   |    |    |
|                                      | 2cbu | 1.85 | Kd=2.1uM   |    |    |
|                                      | 2cbv | 1.95 | Kd=3.3uM   |    |    |
|                                      | 2ces | 2.15 | Kd=56nM    |    |    |
|                                      | 2cet | 1.97 | Kd=9.6nM   |    |    |
|                                      | 2j75 | 1.85 | Kd=225nM   |    |    |
|                                      | 2j77 | 2.1  | Kd=12.9uM  |    |    |
|                                      | 2j78 | 1.65 | Kd=384nM   |    |    |
|                                      | 2j79 | 1.94 | Kd=1.1uM   |    |    |
|                                      | 2j7b | 1.87 | Kd=240nM   |    |    |
|                                      | 2j7d | 2.24 | Kd=74nM    |    |    |
|                                      | 2j7e | 2.19 | Kd=48nM    |    |    |
|                                      | 2j7f | 2.28 | Kd=445nM   |    |    |
|                                      | 2j7g | 1.91 | Kd=100nM   |    |    |
|                                      | 2j7h | 1.95 | Kd=65nM    |    |    |
|                                      | 2cer | 2.29 | Ki<=0.6nM  |    | 46 |

|                       |      |      |            |    |
|-----------------------|------|------|------------|----|
| coagulation factor Xa | 1f0r | 2.1  | Ki=22nM *  | 5  |
|                       | 1f0s | 2.1  | Ki=18nM *  | 5  |
|                       | 1ksn | 2.1  | Ki=0.4nM   | 47 |
|                       | 1lpk | 2.2  | Ki=28nM *  | 48 |
|                       | 1lpz | 2.4  | Ki=25nM *  | 48 |
|                       | 1nfw | 2.1  | Ki=1.1nM * | 49 |
|                       | 1nfx | 2.15 | Ki=3.0nM * | 49 |
|                       | 1nfy | 2.1  | Ki=1.3nM * | 49 |
|                       | 2boh | 2.2  | Ki=3nM *   | 50 |
|                       | 1fjs | 1.92 | Ki=0.11nM  | 51 |
|                       | 1mq5 | 2.1  | Ki=1nM *   | 52 |
|                       | 1mq6 | 2.1  | Ki=7pM *   | 52 |
|                       | 2bok | 1.64 | Ki=0.28uM  | 53 |
|                       | 1nfu | 2.05 | Ki=18nM *  | 49 |
|                       | 1xka | 2.3  | Ki=131nM * | 54 |

1. B. A. Katz, J. M. Clark, J. S. Finer-Moore, T. E. Jenkins, C. R. Johnson, M. J. Ross, C. Luong, W. R. Moore and R. M. Stroud Design of potent selective zinc-mediated serine protease inhibitors. *Nature* 1998; **391**:608-612.
2. B. A. Katz, R. Mackman, C. Luong, K. Radika, A. Martelli, P. A. Sprengeler, J. Wang, H. Chan and L. Wong Structural basis for selectivity of a small molecule, S1-binding, submicromolar inhibitor of urokinase-type plasminogen activator. *Chem Biol* 2000; **7**:299-312.
3. N. Ota, C. Stroupe, J. M. Ferreira-da-Silva, S. A. Shah, M. Mares-Guia and A. T. Brunger Non-Boltzmann thermodynamic integration (NBTI) for macromolecular systems: relative free energy of binding of trypsin to benzamidine and benzylamine. *Proteins* 1999; **37**:641-653.
4. J. S. Bostwick, R. Bentley, S. Morgan, K. Brown, V. Chu, W. R. Ewing, A. P. Spada, H. Pauls, M. H. Perrone, C. T. Dunwiddie and R. J. Leadley, Jr. RPR120844, a novel, specific inhibitor of coagulation factor Xa inhibits venous thrombosis in the rabbit. *Thromb Haemost* 1999; **81**:157-160.
5. S. Maignan, J. P. Guilloteau, S. Pouzieux, Y. M. Choi-Sledeski, M. R. Becker, S. I. Klein, W. R. Ewing, H. W. Pauls, A. P. Spada and V. Mikol Crystal structures of human factor Xa complexed with potent inhibitors. *Journal of Medicinal Chemistry* 2000; **43**:3226-3232.
6. M. Dixon The determination of enzyme inhibitor constants. *Biochemical Journal* 1953; **55**:170-171.

7. E. Toyota, C. Chinen, H. Sekizaki, K. Itoh and K. Tanizawa Application of spontaneous Schiff base copper chelates formation process to the design of a trypsin inhibitor. *Chemical & Pharmaceutical Bulletin* 1996; **44**:1104-1106.
8. E. Toyota, H. Miyazaki, K. Itoh, H. Sekizaki and K. Tanizawa Application of Schiff base copper(II) and iron(III) chelates to site-specific cleavage of a trypsin. *Chemical & Pharmaceutical Bulletin* 1999; **47**:116-119.
9. E. Toyota, K. K. Ng, H. Sekizaki, K. Itoh, K. Tanizawa and M. N. James X-ray crystallographic analyses of complexes between bovine beta-trypsin and Schiff base copper(II) or iron(III) chelates. *Journal of Molecular Biology* 2001; **305**:471-479.
10. B. A. Katz, K. Elrod, C. Luong, M. J. Rice, R. L. Mackman, P. A. Sprengeler, J. Spencer, J. Hataye, J. Janc, J. Link, J. Litvak, R. Rai, K. Rice, S. Sideris, E. Verner and W. Young A novel serine protease inhibition motif involving a multi-centered short hydrogen bonding network at the active site. *J Mol Biol* 2001; **307**:1451-1486.
11. B. A. Katz, K. Elrod, E. Verner, R. L. Mackman, C. Luong, W. D. Shrader, M. Sendzik, J. R. Spencer, P. A. Sprengeler, A. Kolesnikov, V. W. Tai, H. C. Hui, J. G. Breitenbucher, D. Allen and J. W. Janc Elaborate manifold of short hydrogen bond arrays mediating binding of active site-directed serine protease inhibitors. *J Mol Biol* 2003; **329**:93-120.
12. D. Turk, J. Sturzebecher and W. Bode Geometry of binding of the N alpha-tosylated piperidides of m-amidino-, p-amidino- and p-guanidino phenylalanine to thrombin and trypsin. X-ray crystal structures of their trypsin complexes and modeling of their thrombin complexes. *FEBS Lett* 1991; **287**:133-138.
13. M. Whitlow, D. O. Arnaiz, B. O. Buckman, D. D. Davey, B. Griedel, W. J. Guilford, S. K. Koovakkat, A. Liang, R. Mohan, G. B. Phillips, M. Seto, K. J. Shaw, W. Xu, Z. Zhao, D. R. Light and M. M. Morrissey Crystallographic analysis of potent and selective factor Xa inhibitors complexed to bovine trypsin. *Acta Crystallogr D Biol Crystallogr* 1999; **55**:1395-1404.
14. I. V. Kurinov and R. W. Harrison Prediction of new serine proteinase inhibitors. *Nat Struct Biol* 1994; **1**:735-743.
15. D. Rauh, G. Klebe and M. T. Stubbs Understanding protein-ligand interactions: the price of protein flexibility. *J Mol Biol* 2004; **335**:1325-1341.
16. S. Reyda, C. Sohn, G. Klebe, K. Rall, D. Ullmann, H. D. Jakubke and M. T. Stubbs Reconstructing the binding site of factor Xa in trypsin reveals ligand-induced structural plasticity. *Journal of Molecular Biology* 2003; **325**:963-977.
17. J. Sturzebecher, U. Sturzebecher, H. Vieweg, G. Wagner, J. Hauptmann and F. Markwardt Synthetic inhibitors of bovine factor Xa and thrombin comparison of their anticoagulant efficiency. *Thrombosis Research* 1989; **54**:245-252.
18. G. Katona, G. I. Berglund, J. Hajdu, L. Graf and L. Szilagyi Crystal structure reveals basis for the inhibitor resistance of human brain trypsin. *Journal of Molecular Biology* 2002; **315**:1209-1218.
19. C. S. Burgey, K. A. Robinson, T. A. Lyle, P. E. J. Sanderson, S. D. Lewis, B. J. Lucas, J. A. Krueger, R. Singh, C. Miller-Stein, R. B. White, B. Wong, E. A. Lyle, P. D. Williams, C. A. Coburn, B. D. Dorsey, J. C. Barrow, M. T. Stranieri, M. A. Holahan, G. R. Sitko, J. J. Cook, D. R. McMasters, C. M. McDonough, W. M. Sanders, A. A. Wallace, F. C. Clayton, D. Bohn, Y. M. Leonard, T. J. Detwiler, J. J. Lynch, Y. W. Yan, Z. G. Chen, L. Kuo, S. J. Gardell, J. A. Shafer and J. P. Vacca Metabolism-directed

optimization of 3-aminopyrazinone acetamide thrombin inhibitors. Development of an orally bioavailable series containing P1 and P3 pyridines. *Journal of Medicinal Chemistry* 2003; **46**:461-473.

20. C. S. Burgey, K. A. Robinson, T. A. Lyle, P. G. Nantermet, H. G. Selnick, R. C. A. Isaacs, S. D. Lewis, B. J. Lucas, J. A. Krueger, R. Singh, C. Miller-Stein, R. B. White, B. Wong, E. A. Lyle, M. T. Stranieri, J. J. Cook, D. R. McMasters, J. M. Pellicore, S. Pal, A. A. Wallace, F. C. Clayton, D. Bohn, D. C. Welsh, J. J. Lynch, Y. W. Yan, Z. G. Chen, L. Kuo, S. J. Gardell, J. A. Shafer and J. P. Vacca Pharmacokinetic optimization of 3-amino-6-chloropyrazinone acetamide thrombin inhibitors. Implementation of P3 pyridine N-oxides to deliver an orally bioavailable series containing PIN-benzylamides. *Bioorganic & Medicinal Chemistry Letters* 2003; **13**:1353-1357.

21. J. A. Olsen, D. W. Banner, P. Seiler, U. O. Sander, A. D'Arcy, M. Stihle, K. Muller and F. Diederich A fluorine scan of thrombin inhibitors to map the fluorophilicity/fluorophobicity of an enzyme active site: Evidence for C-F center dot center dot center dot C=O interactions. *Angewandte Chemie-International Edition* 2003; **42**:2507-2511.

22. R. Bone, T. B. Lu, C. R. Illig, R. M. Soll and J. C. Spurlino Structural analysis of thrombin complexed with potent inhibitors incorporating a phenyl group as a peptide mimetic and aminopyridines as guanidine substitutes. *Journal of Medicinal Chemistry* 1998; **41**:2068-2075.

23. S. F. Brady, J. T. Sisko, K. J. Stauffer, C. D. Colton, H. Qiu, S. D. Lewis, A. S. Ng, J. A. Shafer, M. J. Bogusky, D. F. Veber and R. F. Nutt Amide and Alpha-Keto Carbonyl Inhibitors of Thrombin Based on Arginine and Lysine - Synthesis, Stability and Biological Characterization. *Bioorganic & Medicinal Chemistry* 1995; **3**:1063-1078.

24. T. A. Lyle, Z. G. Chen, S. D. Appleby, R. M. Freidinger, S. J. Gardell, S. D. Lewis, Y. Li, E. A. Lyle, J. J. Lynch, A. M. Mulichak, A. S. Ng, A. M. NaylorOlsen and W. M. Sanders Synthesis, evaluation, and crystallographic analysis of L-371,912: A potent and selective active-site thrombin inhibitor. *Bioorganic & Medicinal Chemistry Letters* 1997; **7**:67-72.

25. K. Scharer, M. Morgenthaler, P. Seiler, F. Diederich, D. W. Banner, T. Tschopp and U. Obst-Sander Enantiomerically pure thrombin inhibitors for exploring the molecular recognition features of the oxyanion hole. *Helvetica Chimica Acta* 2004; **87**:2517-2538.

26. R. Krishnan, I. Mochalkin, R. Arni and A. Tulinsky Structure of thrombin complexed with selective non-electrophilic inhibitors having cyclohexyl moieties at P1. *Acta Crystallogr D Biol Crystallogr* 2000; **56**:294-303.

27. P. G. Nantermet, J. C. Barrow, C. L. Newton, J. M. Pellicore, M. B. Young, S. D. Lewis, B. J. Lucas, J. A. Krueger, D. R. McMasters, Y. W. Yan, L. C. Kuo, J. P. Vacca and H. G. Selnick Design and synthesis of potent and selective macrocyclic thrombin inhibitors. *Bioorganic & Medicinal Chemistry Letters* 2003; **13**:2781-2784.

28. M. E. Kort, I. Drizin, R. J. Gregg, M. J. Scanio, L. Shi, M. F. Gross, R. N. Atkinson, M. S. Johnson, G. J. Pacofsky, J. B. Thomas, W. A. Carroll, M. J. Krambis, D. Liu, C. C. Shieh, X. Zhang, G. Hernandez, J. P. Mikusa, C. Zhong, S. Joshi, P. Honore, R. Roeloffs, K. C. Marsh, B. P. Murray, J. Liu, S. Werness, C. R. Faltynek, D. S. Krafte, M. F. Jarvis, M. L. Chapman and B. E. Marron Discovery and biological evaluation of 5-aryl-2-furfuramides, potent and selective blockers of the Nav1.8 sodium channel with

efficacy in models of neuropathic and inflammatory pain. *J Med Chem* 2008; **51**:407-416.

29. T. J. Tucker, S. F. Brady, W. C. Lumma, S. D. Lewis, S. J. Gardell, A. M. Naylor-Olsen, Y. W. Yan, J. T. Sisko, K. J. Stauffer, B. J. Lucas, J. J. Lynch, J. J. Cook, M. T. Stranieri, M. A. Holahan, E. A. Lyle, E. P. Baskin, I. W. Chen, K. B. Dancheck, J. A. Krueger, C. M. Cooper and J. P. Vacca Design and synthesis of a series of potent and orally bioavailable noncovalent thrombin inhibitors that utilize nonbasic groups in the P1 position. *Journal of Medicinal Chemistry* 1998; **41**:3210-3219.

30. P. G. Nantermet, C. S. Burgey, K. A. Robinson, J. M. Pellicore, C. L. Newton, J. Z. Deng, H. G. Selnick, S. D. Lewis, B. J. Lucas, J. A. Krueger, C. Miller-Stein, R. B. White, B. Wong, D. R. McMasters, A. A. Wallace, J. J. Lynch, Y. W. Yan, Z. G. Chen, L. Kuo, S. J. Gardell, J. A. Shafer, J. P. Vacca and T. A. Lyle P-2 pyridine N-oxide thrombin inhibitors: a novel peptidomimetic scaffold. *Bioorganic & Medicinal Chemistry Letters* 2005; **15**:2771-2775.

31. J. Z. Deng, D. R. McMasters, P. M. Rabbat, P. D. Williams, C. A. Coburn, Y. Yan, L. C. Kuo, S. D. Lewis, B. J. Lucas, J. A. Krueger, B. Strulovici, J. P. Vacca, T. A. Lyle and C. S. Burgey Development of an oxazolopyridine series of dual thrombin/factor Xa inhibitors via structure-guided lead optimization. *Bioorganic & Medicinal Chemistry Letters* 2005; **15**:4411-4116.

32. R. A. Engh, H. Brandstetter, G. Sucher, A. Eichinger, U. Baumann, W. Bode, R. Huber, T. Poll, R. Rudolph and W. vonderSaal Enzyme flexibility, solvent and 'weak' interactions characterize thrombin-ligand interactions: Implications for drug design. *Structure* 1996; **4**:1353-1362.

33. S. D. Wang, C. Meades, G. Wood, A. Osnowski, S. Anderson, R. Yuill, M. Thomas, M. Mezna, W. Jackson, C. Midgley, G. Griffiths, I. Fleming, S. Green, I. McNae, S. Y. Wu, C. McInnes, D. Zheleva, M. D. Walkinshaw and P. M. Fischer 2-anilino-4-(thiazol-5-yl)pyrimidine CDK inhibitors: Synthesis, SAR analysis, X-ray crystallography, and biological activity. *Journal of Medicinal Chemistry* 2004; **47**:1662-1675.

34. X. J. Chu, W. DePinto, D. Bartkovitz, S. S. So, B. T. Vu, K. Packman, C. Lukacs, Q. J. Ding, N. Jiang, K. Wang, P. Goelzer, X. F. Yin, M. A. Smith, B. X. Higgins, Y. S. Chen, Q. Xiang, J. Moliterni, G. Kaplan, B. Graves, A. Lovey and N. Fotouhi Discovery of [4-amino-2-(1-methanesulfonylpiperidin-4-ylamino) pyrimidin-5-yl](2,3-difluoro-6-methoxyphenyl)methanone (R547), a potent and selective cyclin-dependent kinase inhibitor with significant in vivo antitumor activity. *Journal of Medicinal Chemistry* 2006; **49**:6549-6560.

35. T. G. Davies, J. Bentley, C. E. Arris, F. T. Boyle, N. J. Curtin, J. A. Endicott, A. E. Gibson, B. T. Golding, R. J. Griffin, I. R. Hardcastle, P. Jewsbury, L. N. Johnson, V. Mesguiche, D. R. Newell, M. E. M. Noble, J. A. Tucker, L. Wang and H. J. Whitfield Structure-based design of a potent purine-based cyclin-dependent kinase inhibitor. *Nature Structural Biology* 2002; **9**:745-749.

36. P. Akamine, Madhusudan, L. L. Brunton, H. D. Ou, J. M. Canaves, N. H. Xuong and S. S. Taylor Balanol analogues probe specificity determinants and the conformational malleability of the cyclic 3',5'-adenosine monophosphate-dependent protein kinase catalytic subunit. *Biochemistry* 2004; **43**:85-96.



37. L. Prade, R. A. Engh, A. Girod, V. Kinzel, R. Huber and D. Bossemeyer Staurosporine-induced conformational changes of cAMP-dependent protein kinase catalytic subunit explain inhibitory potential. *Structure* 1997; **5**:1627-1637.
38. R. A. Engh, A. Girod, V. Kinzel, R. Huber and D. Bossemeyer Crystal structures of catalytic subunit of cAMP-dependent protein kinase in complex with isoquinolinesulfonyl protein kinase inhibitors H7, H8, and H89 - Structural implications for selectivity. *Journal of Biological Chemistry* 1996; **271**:26157-26164.
39. M. Jacobs, K. Hayakawa, L. Swenson, S. Bellon, M. Fleming, P. Taslimi and J. Doran The structure of dimeric ROCK I reveals the mechanism for ligand selectivity. *Journal of Biological Chemistry* 2006; **281**:260-268.
40. B. A. Katz, P. A. Sprengeler, C. Luong, E. Verner, K. Elrod, M. Kirtley, J. Janc, J. R. Spencer, J. G. Breitenbucher, H. Hui, D. McGee, D. Allen, A. Martelli and R. L. Mackman Engineering inhibitors highly selective for the S1 sites of Ser190 trypsin-like serine protease drug targets. *Chemistry & Biology* 2001; **8**:1107-1121.
41. S. Sperl, U. Jacob, N. A. de Prada, J. Sturzebecher, O. G. Wilhelm, W. Bode, V. Magdolen, R. Huber and L. Moroder (4-Aminomethyl)phenylguanidine derivatives as nonpeptidic highly selective inhibitors of human urokinase. *Proceedings of the National Academy of Sciences of the United States of America* 2000; **97**:5113-5118.
42. E. Zeslawska, U. Jacob, A. Schweinitz, G. Coombs, W. Bode and E. Madison Crystals of urokinase type plasminogen activator complexes reveal the binding mode of peptidomimetic inhibitors. *Journal of Molecular Biology* 2003; **328**:109-118.
43. M. D. Wendt, T. W. Rockway, A. Geyer, W. McClellan, M. Weitzberg, X. M. Zhao, R. Mantei, V. L. Nienaber, K. Stewart, V. Klinghofer and V. L. Giranda Identification of novel binding interactions in the development of potent, selective 2-naphthamide inhibitors of urokinase. Synthesis, structural analysis, and SAR of N-phenyl amide 6-substitution. *Journal of Medicinal Chemistry* 2004; **47**:303-324.
44. M. D. Wendt, A. Geyer, W. J. McClellan, T. W. Rockway, M. Weitzberg, X. M. Zhao, R. Mantei, K. Stewart, V. Nienaber, V. Klinghofer and V. L. Giranda Interaction with the SI beta-pocket of urokinase: 8-heterocycle substituted and 6,8-disubstituted 2-naphthamide urokinase inhibitors. *Bioorganic & Medicinal Chemistry Letters* 2004; **14**:3063-3068.
45. F. Vincent, T. M. Gloster, J. Macdonald, C. Morland, R. V. Stick, F. M. V. Dias, J. A. M. Prates, C. Fontes, H. J. Gilbert and G. J. Davies Common inhibition of both beta-glucosidases and beta-mannosidases by isofagomine lactam reflects different conformational itineraries for pyranoside hydrolysis. *Chembiochem* 2004; **5**:1596-1599.
46. T. M. Gloster, S. Roberts, G. Perugino, M. Rossi, M. Moracci, N. Panday, M. Terinek, A. Vasella and G. J. Davies Structural, kinetic, and thermodynamic analysis of glucoimidazole-derived glycosidase inhibitors. *Biochemistry* 2006; **45**:11879-11884.
47. K. R. Guertin, C. J. Gardner, S. I. Klein, A. L. Zulli, M. Czekaj, Y. Gong, A. P. Spada, D. L. Cheney, S. Maignan, J. P. Guilloteau, K. D. Brown, D. J. Colussi, V. Chu, C. L. Heran, S. R. Morgan, R. G. Bentley, C. T. Dunwiddie, R. J. Leadley and H. W. Pauls Optimization of the beta-aminoester class of factor Xa inhibitors. Part 2: Identification of FXV673 as a potent and selective inhibitor with excellent in vivo anticoagulant activity. *Bioorganic & Medicinal Chemistry Letters* 2002; **12**:1671-1674.
48. H. Matter, E. Defossa, U. Heinelt, P. M. Blohm, D. Schneider, A. Muller, S. Herok, H. Schreuder, A. Liesum, V. Brachvogel, P. Lonze, A. Walser, F. Al-Obeidi and

- P. Wildgoose Design and quantitative structure-activity relationship of 3-amidinobenzyl-1H-indole-2-carboxamides as potent, nonchiral, and selective inhibitors of blood coagulation factor Xa. *Journal of Medicinal Chemistry* 2002; **45**:2749-2769.
49. S. Maignan, J. P. Guilloteau, Y. M. Choi-Sledski, M. R. Becker, W. R. Ewing, H. W. Pauls, A. P. Spada and V. Mikol Molecular structures of human factor Xa complexed with ketopiperazine inhibitors: Preference for a neutral group in the S1 pocket. *Journal of Medicinal Chemistry* 2003; **46**:685-690.
50. M. Nazare, D. W. Will, H. Matter, H. Schreuder, K. Ritter, M. Urmann, M. Essrich, A. Bauer, M. Wagner, J. Czech, M. Lorenz, V. Laux and V. Wehner Probing the subpockets of factor Xa reveals two binding modes for inhibitors based on a 2-carboxyindole scaffold: A study combining structure-activity relationship and X-ray crystallography. *Journal of Medicinal Chemistry* 2005; **48**:4511-4525.
51. M. Adler, D. D. Davey, G. B. Phillips, S. H. Kim, J. Jancarik, G. Rumennik, D. R. Light and M. Whitlow Preparation, characterization, and the crystal structure of the inhibitor ZK-807834 (CI-1031) complexed with factor Xa. *Biochemistry* 2000; **39**:12534-12542.
52. M. Adler, M. J. Kochanny, B. Ye, G. Rumennik, D. R. Light, S. Biancalana and M. Whitlow Crystal structures of two potent nonamidine inhibitors bound to factor Xa. *Biochemistry* 2002; **41**:15514-15523.
53. K. Scharer, M. Morgenthaler, R. Paulini, U. Obst-Sander, D. W. Banner, D. Schlatter, J. Benz, M. Stihle and F. Diederich Quantification of cation-pi interactions in protein-ligand complexes: Crystal-structure analysis of factor Xa bound to a quaternary ammonium ion ligand. *Angewandte Chemie-International Edition* 2005; **44**:4400-4404.
54. D. Venkateswarlu, L. Perera, T. Darden and L. G. Pedersen Structure and dynamics of zymogen human blood coagulation factor X. *Biophysical Journal* 2002; **82**:1190-1206.
